# Supplementary material
Source: Springer Nature journal article supplement (https://www.springermedizin.de/resource/supplementary/13012_2012_597_MOESM1_ESM.pdf/9630346)
Supplement: MOESM1 [file 9630346]

Purveyor  
program  
delivered to  
provider  
organizations

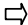

Provider organizations  
improve skill, knowledge,  
and capacity to deliver  
peer education HIV  
prevention intervention

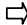

Provider  
organizations  
implement the  
HIV prevention  
intervention with  
strength and  
fidelity

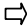

Reduce HIV  
infections among  
youth
